# Supplementary material for: CircHECTD1 Regulates Cell Proliferation and Migration by the miR-320-5p/SLC2A1 Axis in Glioblastoma Multiform
Source: Front Oncol. 2021 May 17;11:666391. doi: 10.3389/fonc.2021.666391 (PMC8166227; doi:10.3389/fonc.2021.666391)
Supplement: Supplementary file 1 [file Table_1.xlsx]

## Sheet: Sheet1
Primer Symbol	5'to3'
Hectd1-F	5’-TGACGAGGACTTGCCTGAAC-3’
Hectd1-R	5’-TCCTCGTATTCTTGGTCCTCCT-3’
CDK2-F	5’-CTTTGCCGAAATGGTGACCC-3’
CDK2-R	5’-CCCAGAGTCCGAAAGATCCG -3’
CyclinD1-F	5’-TCAAGTGTGACCCGGACTG-3’
CyclinD1-R	5’-GGATCGATGTTCTGCTGGGC-3’
PCNA-F	5’-ATATGCCGGGACCTTAGCCA-3’
PCNA-R	5’-TCGCAGAAAACTTCACCCCG-3’
Scl2a1-F	5’-ATAGGGGTCCAGGCTCCATT-3’
Scl2a1-R	5’-GAGTGTCCGTGTCTTCAGCA-3’
circHectd1-F	5’-CCTCATTCGTGCTGCCTGTGGTA-3’
circHectd1-R	5’-CTGGCCCTTTGCTTGTTTATTTT-3’
